# Supplementary material for: Agent-Based Spatiotemporal Simulation of Biomolecular Systems within the Open Source MASON Framework
Source: Biomed Res Int. 2015 Mar 22;2015:769471. doi: 10.1155/2015/769471 (PMC4385633; doi:10.1155/2015/769471)
Supplement: Supplementary file 1 — Supplementary material provides a live demonstration of the biomolecular simulation of the two-step enzymatic reaction. Video “SimulatorDemo” provides general view of the simulator in action while the video “SimulatorDemo_Zoom” provides a closer look into the continuous two-dimensional space, notably over the behaviour of the smaller molecules. [file 769471.f1.zip]

Archive with 2 entries (2 files):
- SimulatorDemo
- SimulatorDemo_Zoom
